# Supplementary material for: Associations between Sperm Epigenetic Age and Semen Parameters: An Evaluation of Clinical and Non-Clinical Cohorts
Source: MDPI journal article supplement (doi:10.3390/cimb46020101), 2024-02-16
Supplement: s1 [file s1]

**Supplementary Table S1.** Results of multivariable linear regression models of general semen parameters for the LIFE (n=379) and SEEDS (n=192) cohorts.

|                                   | LIFE                       | SEEDS                     |
|-----------------------------------|----------------------------|---------------------------|
| <b>Semen Parameter</b>            |                            |                           |
| Sperm count (millions)            | -0.02 (-0.08, 0.04), 0.57  | 0.03 (-0.07, 0.13), 0.59  |
| Sperm volume (ml)                 | -0.001 (-0.04, 0.03), 0.97 | -0.01 (-0.07, 0.04), 0.59 |
| Sperm concentration (millions/ml) | -0.02 (-0.07, 0.04), 0.57  | 0.04 (-0.05, 0.14), 0.39  |
| Normal morphology (%)             | -0.52 (-1.36, 0.33), 0.23  | 0.01 (-0.06, 0.09), 0.69  |
| Sperm motility (%)                | ---                        | 0.01 (-0.05, 0.08), 0.74  |
| Strict's Criteria (%)             | -0.03 (-0.08, 0.03), 0.19  | ---                       |

Models were adjusted for male BMI and smoking status. Data presented as  $\beta$ -estimate (95% confidence interval), p-value.

**Supplementary Table S2.** Results of multivariable linear regression for the detailed sperm parameters for the LIFE cohort (n=379).

| Detailed Sperm Parameters              | $\beta$ -estimate (95% CI), p-value |
|----------------------------------------|-------------------------------------|
| <b>Head Descriptive Parameters</b>     |                                     |
| Head Width ( $\mu\text{m}$ )           | -0.01 (-0.02, 0.001), 0.08          |
| Head Perimeter ( $\mu\text{m}$ )       | <b>0.04 (0.01, 0.07), 0.045 *</b>   |
| Head Length ( $\mu\text{m}$ )          | <b>0.03 (0.07, 0.05), 0.008 *</b>   |
| Head Area ( $\mu\text{m}^2$ )          | 0.02 (-0.04, 0.07), 0.56            |
| Elongation factor                      | <b>-0.56 (-0.92, -0.2), 0.002 *</b> |
| Acrosome (%)                           | -0.06 (-0.4, 0.28), 0.72            |
| <b>Head Morphology parameters (%)</b>  |                                     |
| Tapered head                           | <b>0.52 (0.07, 0.97), 0.02 *</b>    |
| Swollen heads                          | -0.01 (-0.02, 0.004), 0.22          |
| Round head                             | 0.48 (-0.16, 1.1), 0.14             |
| Pyriform head                          | <b>0.43 (0.14, 0.73), 0.004 *</b>   |
| Micro head                             | -0.26 (-0.72, 0.21), 0.29           |
| Megalo head                            | 0.04 (-0.26, 0.34), 0.79            |
| Bicephalous head                       | -0.23 (-0.86, 0.40), 0.47           |
| Amorphous head                         | -0.01 (-0.65, 0.23), 0.35           |
| <b>Miscellaneous abnormalities (%)</b> |                                     |
| Other tail defects                     | 0.06 (-0.09, 0.21), 0.42            |
| Neck and Midpiece defects              | 0.02 (-0.006, 0.05), 0.14           |
| Immature                               | -0.41 (-0.88, 0.06), 0.09           |
| Cytoplasmic droplet                    | 0.01 (-0.03, 0.05), 0.58            |
| Coiled tails                           | 0.01 (-0.03, 0.04), 0.75            |
| <b>Sperm DNA Integrity (%)</b>         |                                     |
| High DNA Stainability                  | 0.04 (-0.01, 0.08), 0.1             |
| DNA Fragmentation Index                | -0.002 (-0.28, 0.25), 0.93          |

Models were adjusted for male BMI and smoking status. Data presented as  $\beta$ -estimate (95% confidence interval), p-value. \* represents a p-value of < 0.05.
